# Supplementary material
Source: publisher figshare collection journal article supplement (https://future-science-group.figshare.com/articles/dataset/_/20178815)
Supplement: Supplementary file 1 [file 1]

**Supplementary Table 1** Primer sequences for RT-qPCR

| Gene | Sequence (5'-3') |
| --- | --- |
| *PPARγ* (human) | Forward: 5'-CATGGCAATTGAATGTCGTGTC-3' |
| Reverse: 5'-CCGGAAGAAACCCTTGCA-3' |
| *DNMT3A* (human) | Forward: 5'-CCTCTTCGTTGGAGGAATGTGC-3' |
| Reverse: 5'-GTTTCCGCACATGAGCACCTCA-3' |
| *GLUT1* (human) | Forward: 5'-TGAGCATCGTGGCCATCTTT-3' |
| Reverse: 5'-CAGAACCAGGAGCACAGTGAAG-3' |
| *SCD1* (human) | Forward: 5'-CCTGGTTTCACTTGGAGCTGTG-3' |
| Reverse: 5'-TGTGGTGAAGTTGATGTGCCAGC-3' |
| *GAPDH* (human) | Forward: 5'-GTCTCCTCTGACTTCAACAGCG-3' |
| Reverse: 5'-ACCACCCTGTTGCTGTAGCCAA-3' |
| *Osteocalcin* (human) | Forward: 5'-CCACCGAGACACCATGAGAG-3' |
| Reverse: 5'-CGCCTGGGTCTCTTCACTAC-3' |
| *Runx2* (human) | Forward: 5'-CCCAGTATGAGAGTAGGTGTCC-3' |
| Reverse: 5'-GGGTAAGACTGGTCATAGGACC-3' |
| *COL1A1* (human) | Forward: 5'-AAGGTGTTGTGCGATGACGTG-3' |
| Reverse: 5'-CACGTCATCGCACAACACCTT-3' |
| *PPARγ* (mouse) | Forward: 5'-GACGCGGAAGAAGAGACCTG-3' |
| Reverse: 5'-TCACCTTGTCGTCACACTCG-3' |
| *DNMT3a* (mouse) | Forward: 5'-CTCGGACCCCGCAACTCG-3' |
| Reverse: 5'-ATCCCGTTTCCGTTTGCTGA-3' |
| *GLUT1* (mouse) | Forward: 5'-GTGACGATCTGAGCTACGGG-3' |
| Reverse: 5'-TGCATTGCCCATGATGGAGT-3' |
| *SCD1* (mouse) | Forward: 5'-GAGTAGCTGAGCTTTGGGCT-3' |
| Reverse: 5'-ACTTCATCAGCGGGGACTTG-3' |
| *GAPDH* (mouse) | Forward: 5'-CCCTTAAGAGGGATGCTGCC-3' |
| Reverse: 5'-ACTGTGCCGTTGAATTTGCC-3' |
| *Osteocalcin* (mouse) | Forward: 5'-ATGGCTTGAAGACCGCCTAC-3' |
| Reverse: 5'-GACAGGGAGGATCAAGTCCC-3' |
| *Runx2* (mouse) | Forward: 5'-CATGGCCGGGAATGATGAGA-3' |
| Reverse: 5'-CCTGGGATCTCGTCCGCTC-3' |
| *COL1A1* (mouse) | Forward: 5'-TTCTCCTGGCAAAGACGGAC-3' |
| Reverse: 5'-CCATCGGTCATGCTCTCTCC-3' |
